# Supplementary material for: Ecotope-Based Entomological Surveillance and Molecular Xenomonitoring of Multidrug Resistant Malaria Parasites inAnophelesVectors
Source: Hindawi journal article supplement (doi:10.1155/2014/969531), 2014-01-01
Supplement: f1 [file 969531.f1.pdf]

# S1: Plasmodium vivax strain Pvdibbt-1 dihydrofolate reductase (dhfr) gene, partial cds

GenBank: KC121333.1

## [FASTA Graphics](#)

### [Go to:](#)

LOCUS KC121333 582 bp DNA linear INV 06-FEB-2013  
DEFINITION Plasmodium vivax strain Pvdibbt-1 dihydrofolate reductase (dhfr) gene, partial cds.  
ACCESSION KC121333  
VERSION KC121333.1 GI:444792510  
KEYWORDS .  
SOURCE Plasmodium vivax (malaria parasite P. vivax)  
ORGANISM [Plasmodium vivax](#)  
Eukaryota; Alveolata; Apicomplexa; Aconoidasida; Haemosporida; Plasmodium; Plasmodium (Plasmodium).  
REFERENCE 1 (bases 1 to 582)  
AUTHORS Sorosjinda-Nunthawarasilp,P., Rattaprasert,P., Suntornthiticharoen,P., Markwardt,R.A. and Wihokhern,B.  
TITLE Direct Submission  
JOURNAL Submitted (01-NOV-2012) Fundamentals of Public Health, Faculty of Public Health, Burapha University, 169 Longhard Bangsean Road, Muang, Chonburi 20131, Thailand  
COMMENT ##Assembly-Data-START##  
Sequencing Technology :: Sanger dideoxy sequencing  
##Assembly-Data-END##  
FEATURES Location/Qualifiers  
source 1..582  
/organism="Plasmodium vivax"  
/mol\_type="genomic DNA"  
/strain="Pvdibbt-1"  
/db\_xref="taxon:5855"  
/PCR\_primers="fwd\_name: pvh-fw, fwd\_seq: atctgcatgctgcaag, rev\_name: pvh-rv, rev\_seq: gaagaagacgtcacacggctag"  
[gene](#) <1..>582  
/gene="dhfr"  
[mRNA](#) <1..>582  
/gene="dhfr"  
/product="dihydrofolate reductase"  
[CDS](#) <1..>582  
/gene="dhfr"  
/codon\_start=1  
/product="dihydrofolate reductase"  
/protein\_id="AGE12495.1"  
/db\_xref="GI:444792511"  
/translation="ICACCKVAPTSEGTKNEPFSPTFRGLGNKGTLPWKCNVDMKY  
IRSVMTYVDESKYEKWKREYLRMEASQGGDNTSGGDNTHGGDNADKLNQVVVMG  
RSTWESIPKQYKPLPNRINNVLSKTLTKEDVKEKVFIIIDSIDDLKLLKLYYKCFI  
IGGAQVYRECLSRNLKQIYFTRINGAYPCDVFF"  
[variation](#) 133  
/gene="dhfr"  
/replace="t"  
[variation](#) 135  
/gene="dhfr"  
/replace="c"  
[variation](#) 138  
/gene="dhfr"  
/replace="c"  
[variation](#) 146  
/gene="dhfr"  
/replace="c"  
[variation](#) 314  
/gene="dhfr"

/replace="g"

ORIGIN

```
1 atctgcgcat gctgcaaggt cgccccacc agtgaagga caaagaatga accgttcage
61 ccgcgacct ttaggggtct gggcaataag gggactctcc catggaaatg caactccgtc
121 gatatgaagt acataaggtc ggtgatgacc tacgtggatg agtcaaagta tgagaagcta
181 aagtgaaga gggagaggta cctacgaatg gaagcctcac aggggggggg tgacaacaca
241 agcggtggtg acaacacaca cggtggtgac aacgccgaca agctgcaaaa cgtcgtggtc
301 atggggagaa gcacctggga gagcatcccc aagcagtaca agccgctccc aaacagaatc
361 aacgtcgtgc tttccaagac gctaacaag gaagacgtga aggaaaaggt cttcataatt
421 gacagcatag atgacctact gctgctctta aagaagctga agtactacaa atgcttcatt
481 attgggggag cacaagtta tagggaatgc ctaagtagaa acttaatcaa gcagatctac
541 ttcacgagga tcaacggcgc ctaccctgtg gacgtcttct tc
```

//

## S2: Plasmodium vivax strain Pvachtk-1 dihydrofolate reductase (dhfr) gene, partial cds

GenBank: KC121334.1

### [FASTA Graphics](#)

#### [Go to:](#)

LOCUS KC121334 582 bp DNA linear INV 06-FEB-2013  
DEFINITION Plasmodium vivax strain Pvachtk-1 dihydrofolate reductase (dhfr) gene, partial cds.  
ACCESSION KC121334  
VERSION KC121334.1 GI:444792512  
KEYWORDS .  
SOURCE Plasmodium vivax (malaria parasite P. vivax)  
ORGANISM [Plasmodium vivax](#)  
Eukaryota; Alveolata; Apicomplexa; Aconoidasida; Haemosporida; Plasmodium; Plasmodium (Plasmodium).  
REFERENCE 1 (bases 1 to 582)  
AUTHORS Sorosjinda-Nunthawarasilp,P., Rattaprasert,P., Suntornthiticharoen,P., Markwardt,R.A. and Wihokhern,B.  
TITLE Direct Submission  
JOURNAL Submitted (01-NOV-2012) Fundamentals of Public Health, Faculty of Public Health, Burapha University, 169 Longhard Bangsean Road, Muang, Chonburi 20131, Thailand  
COMMENT ##Assembly-Data-START##  
Sequencing Technology :: Sanger dideoxy sequencing  
##Assembly-Data-END##  
FEATURES Location/Qualifiers  
source 1..582  
/organism="Plasmodium vivax"  
/mol\_type="genomic DNA"  
/strain="Pvachtk-1"  
/db\_xref="taxon:5855"  
/PCR\_primers="fwd\_name: pvh-fw, fwd\_seq: atctgcatgctgcaag, rev\_name: pvh-rv, rev\_seq: gaagaagacgtcacacggctag"  
[gene](#) <1..>582  
/gene="dhfr"  
[mRNA](#) <1..>582  
/gene="dhfr"  
/product="dihydrofolate reductase"  
[CDS](#) <1..>582  
/gene="dhfr"  
/codon\_start=1  
/product="dihydrofolate reductase"  
/protein\_id="AGE12496.1"  
/db\_xref="GI:444792513"  
/translation="ICACCKVAPTSEGTKNEPFSRPTFRGLGNKGTLPWKCNSVDMKY  
IRSVMTYVDESKYEKWKREYLRMEASQGGDNTSGGDNTHGGDNANKLQNVVVMG  
RSTWESIPKQYKPLPNRINVLVSKTLTKEDLKEKVFIIIDSIDDLKLLKLLKYYKCFI  
IGGAQVYRECLSRNLKQIYFTRINGAYPCDVFF"  
[variation](#) 133  
/gene="dhfr"  
/replace="t"  
[variation](#) 135  
/gene="dhfr"  
/replace="c"  
[variation](#) 138  
/gene="dhfr"  
/replace="c"  
[variation](#) 146  
/gene="dhfr"  
/replace="c"  
[variation](#) 277  
/gene="dhfr"

variation /replace="g"  
314  
/gene="dhfr"  
variation /replace="g"  
397  
/gene="dhfr"  
/replace="g"

ORIGIN

```
1 atctgcat gctgcaaggt cgccccacc agtgaagga caaagaatga accgttcagc
61 ccgcgacct ttaggggtct gggcaataag gggactctcc catggaaatg caactccgtc
121 gatatgaagt acataaggtc ggtgatgacc tacgtggatg agtcaaagta tgagaagcta
181 aagtgaaga gggagaggta cctacgaatg gaagcctcac aggggggggg tgacaacaca
241 agcgggtggtg acaacacaca cgggtggtgac aacgccaaca agctgcaaaa cgctgtggtc
301 atggggagaa gcacctggga gagcatcccc aagcagtaca agccgctccc aaacagaatc
361 aacgtcgtgc tttccaagac gctaacaag gaagacctga aggaaaagg cttcataatt
421 gacagcatag atgacctact gctgctctta aagaagctga agtactacaa atgcttcac
481 attgggggag cacaagtta tagggaatgc ctaagtagaa acttaatcaa gcagatctac
541 ttcacgagga tcaacggcgc ctaccogtgt gacgtcttct tc
```

//

### S3: Plasmodium vivax strain Pvachtk-2 dihydrofolate reductase (dhfr) gene, partial cds

GenBank: KC121335.1

#### [FASTA Graphics](#)

#### [Go to:](#)

LOCUS KC121335 582 bp DNA linear INV 06-FEB-2013  
DEFINITION Plasmodium vivax strain Pvachtk-2 dihydrofolate reductase (dhfr) gene, partial cds.  
ACCESSION KC121335  
VERSION KC121335.1 GI:444792514  
KEYWORDS .  
SOURCE Plasmodium vivax (malaria parasite P. vivax)  
ORGANISM [Plasmodium vivax](#)  
Eukaryota; Alveolata; Apicomplexa; Aconoidasida; Haemosporida; Plasmodium; Plasmodium (Plasmodium).  
REFERENCE 1 (bases 1 to 582)  
AUTHORS Sorosjinda-Nunthawarasilp,P., Rattaprasert,P., Suntornthiticharoen,P., Markwardt,R.A. and Wihokhern,B.  
TITLE Direct Submission  
JOURNAL Submitted (01-NOV-2012) Fundamentals of Public Health, Faculty of Public Health, Burapha University, 169 Longhard Bangsean Road, Muang, Chonburi 20131, Thailand  
COMMENT ##Assembly-Data-START##  
Sequencing Technology :: Sanger dideoxy sequencing  
##Assembly-Data-END##  
FEATURES Location/Qualifiers  
source 1..582  
/organism="Plasmodium vivax"  
/mol\_type="genomic DNA"  
/strain="Pvachtk-2"  
/db\_xref="taxon:5855"  
/PCR\_primers="fwd\_name: pvh-fw, fwd\_seq: atctgcatgctgcaag, rev\_name: pvh-rv, rev\_seq: gaagaagacgtcacacggctag"  
[gene](#) <1..>582  
/gene="dhfr"  
[mRNA](#) <1..>582  
/gene="dhfr"  
/product="dihydrofolate reductase"  
[CDS](#) <1..>582  
/gene="dhfr"  
/codon\_start=1  
/product="dihydrofolate reductase"  
/protein\_id="AGE12497.1"  
/db\_xref="GI:444792515"  
/translation="ICACCKVAPTSEGTKNEPFSRPTFRGLGNKGTLPWKCNVDMKY  
IRSVMTYVDESKYEKWKREYLRMEASQGGDNTSGGDNTHGGDNADKLNQVVVMG  
RSTWESIPKQYKPLPNRINVVLSKTLTKEDVKEKVFIIIDSIDDLKKLKYKCFI  
IGGAQVYRECLSRNLKQIYFTRINGAYPCDVFF"  
[variation](#) 133  
/gene="dhfr"  
/replace="t"  
[variation](#) 135  
/gene="dhfr"  
/replace="c"  
[variation](#) 138  
/gene="dhfr"  
/replace="c"  
[variation](#) 146  
/gene="dhfr"  
/replace="c"  
[variation](#) 314  
/gene="dhfr"

/replace="g"

ORIGIN

```
1 atctgcgcat gctgcaaggt cgccccacc agtgaagga caaagaatga accgttcage
61 ccgcgacct ttaggggtct gggcaataag gggactctcc catggaaatg caactccgtc
121 gatatgaagt acataaggtc ggtgatgacc tacgtggatg agtcaaagta tgagaagcta
181 aagtgaaga gggagaggta cctacgaatg gaagcctcac aggggggggg tgacaacaca
241 agcgggtggtg acaacacaca cgggtggtgac aacgccgaca agctgcaaaa cgtcgtggtc
301 atggggagaa gcacctggga gagcatcccc aagcagtaca agccgctccc aaacagaatc
361 aacgtcgtgc tttccaagac gctaacaag gaagacgtga aggaaaaggt cttcataatt
421 gacagcatag atgacctact gctgctctta aagaagctga agtactacaa atgcttcatc
481 attgggggag cacaagtta tagggaatgc ctaagtagaa acttaatcaa gcagatctac
541 ttcacgagga tcaacggcgc ctaccctgtg gacgtcttct tc
```

//

**S4:** *P. vivax* malaria parasites originally isolated from SG DNAs of *An. dirus* and *An. aconitus* that possesses DHFR homolog with recently emerging haplogroup G as compared to haplogroups A to F

| Haplo-group | Protein Accession | Genome Accession | Source | <sup>a</sup> Mutation of haplotype |    |    |                                |                                                                                  |     |     |     |     |  |
|-------------|-------------------|------------------|--------|------------------------------------|----|----|--------------------------------|----------------------------------------------------------------------------------|-----|-----|-----|-----|--|
|             |                   |                  |        | 33                                 | 57 | 58 | 61                             | ΔIndel                                                                           | 105 | 117 | 145 | 173 |  |
| A           | ABC02004          | DQ244111         | PG2005 | P                                  | F  | S  | T                              | NTHGGD                                                                           | D   | S   | V   | I   |  |
|             | CAA66805          | X98123           | 1996** | P                                  | F  | S  | T                              | <a href="#">NTSGGD</a>  NTHGGD                                                   | D   | S   | V   | I   |  |
|             | ABC02002          | DQ244109         | PH2005 | P                                  | F  | S  | T                              | <a href="#">NTSGGD</a>  NTHGGD                                                   | D   | S   | V   | I   |  |
|             | AAV41263          | AY772075         | ID2004 | P                                  | F  | S  | T                              | NTSGGD                                                                           | D   | S   | V   | I   |  |
|             | ADD37866          | GU224157         | KR2009 | P                                  | F  | S  | T                              | NTSGGD                                                                           | D   | S   | V   | I   |  |
|             | AAV41266          | AY772078         | ID2004 | P                                  | F  | S  | T                              | <a href="#">NTSGGD</a>  NTHGGD                                                   | D   | S   | V   | I   |  |
|             | CAA05915          | AJ003157         | MM1997 | P                                  | F  | S  | T                              | <a href="#">NTSGGD</a>  NTHGGD                                                   | D   | S   | V   | I   |  |
|             | ABG73611          | DQ679978         | IN2006 | P                                  | F  | S  | T                              | NTHGGD                                                                           | D   | S   | V   | I   |  |
|             | CAA05848          | AJ003075         | DJ1997 | P                                  | F  | S  | T                              | NTHGGD                                                                           | D   | S   | V   | I   |  |
|             | ABH05711          | DQ789665         | IN2006 | P                                  | F  | S  | T                              | NTHGGD                                                                           | D   | S   | V   | I   |  |
|             | ABC02015          | DQ244122         | VN2005 | P                                  | F  | S  | T                              | <a href="#">NTSGGD</a>  NTHGGD                                                   | D   | S   | V   | I   |  |
|             | ABH05713          | DQ789667         | IN2006 | P                                  | F  | S  | T                              | <a href="#">NTSGGD</a>   <a href="#">NTHGGD</a>  NTHGGD                          | D   | S   | V   | I   |  |
|             | AAV24546          | AY942925         | MM2005 | P                                  | F  | S  | T                              | <a href="#">NTSGGD</a>  NTHGGD                                                   | D   | S   | V   | I   |  |
|             | AAV41262          | AY772074         | ID2004 | P                                  | F  | S  | T                              | NTHGGD                                                                           | D   | S   | V   | I   |  |
|             | ABH05718          | DQ789672         | IN2006 | P                                  | F  | S  | T                              | <a href="#">NTSGGD</a>  NTHGGD                                                   | D   | S   | V   | I   |  |
|             | CAA05846          | AJ003073         | KM1997 | P                                  | F  | S  | T                              | <a href="#">NTSGGD</a>  NTHGGD                                                   | D   | S   | V   | I   |  |
|             | BAI79254          | AB547457         | IR2010 | P                                  | F  | S  | T                              | <a href="#">NTSGGD</a>   <a href="#">NTHGGD</a>  NTHGGD                          | D   | S   | V   | I   |  |
|             | CAA05847          | AJ003074         | SR1997 | P                                  | F  | S  | T                              | <a href="#">NTSGGD</a>  NTHGGD                                                   | D   | S   | V   | I   |  |
|             | ABV59163          | EU145907         | IN2007 | P                                  | F  | S  | T                              | NTHGGD                                                                           | D   | S   | V   | I   |  |
|             | AAO16082          | AF525814         | TH2002 | P                                  | F  | S  | T                              | <a href="#">NTSGGD</a>  NTHGGD                                                   | D   | S   | V   | I   |  |
|             | AAV41265          | AY772077         | PG2004 | P                                  | F  | S  | T                              | <a href="#">NTSGGD</a>   <a href="#">NTSGGD</a>   <a href="#">NTHGGD</a>  DTHGGD | D   | S   | V   | I   |  |
|             | ABG73610          | DQ679977         | IN2006 | P                                  | F  | S  | T                              | <a href="#">NTSGGD</a>  NTHGGD                                                   | D   | S   | V   | I   |  |
|             | ABV59199          | EU145943         | IN2007 | P                                  | F  | S  | T                              | <a href="#">NTSGGD</a>   <a href="#">NTHGGD</a>  NTHGGD                          | D   | S   | V   | I   |  |
|             | BAI79255          | AB547458         | IR2010 | P                                  | F  | S  | T                              | <a href="#">NTSGGD</a>  NTHGGD                                                   | D   | S   | V   | I   |  |
|             | ABV59200          | EU145944         | IN2007 | P                                  | F  | S  | T                              | NTSGGD                                                                           | D   | S   | V   | I   |  |
|             | ABH05704          | DQ789658         | IN2006 | P                                  | F  | S  | T                              | NTSGGD                                                                           | D   | S   | V   | I   |  |
| ABV59203    | EU145947          | IN2007           | P      | F                                  | S  | T  | <a href="#">NTSGGD</a>  NTHGGD | D                                                                                | S   | V   | I   |     |  |
| B           | CAA05830          | AJ003054         | KM1997 | L                                  | F  | S  | T                              | <a href="#">NTSGGD</a>  NTHGGD                                                   | N   | S   | V   | I   |  |
|             | CAA05829          | AJ003053         | MG1997 | L                                  | F  | S  | T                              | <a href="#">NTSGGD</a>  NTHGGD                                                   | D   | S   | V   | I   |  |
|             | AAO16081          | AF525813         | TH2002 | L                                  | F  | S  | T                              | <a href="#">NTSGGD</a>  NTHGGD                                                   | D   | S   | V   | I   |  |
|             | CAA05849          | AJ003076         | MG1997 | L                                  | F  | S  | T                              | <a href="#">NTSGGD</a>  NTHGGD                                                   | D   | S   | V   | I   |  |
|             | ABY25360          | EU168426         | MG2007 | L                                  | F  | S  | T                              | <a href="#">NTSGGD</a>  NTHGGD                                                   | D   | S   | V   | I   |  |
|             | ABY25361          | EU168427         | MG2007 | P                                  | F  | S  | T                              | <a href="#">NTSGGD</a>  NTHGGD                                                   | D   | N   | V   | I   |  |
|             | ABY25365          | EU168431         | MG2007 | P                                  | F  | R  | T                              | <a href="#">NTSGGD</a>  NTHGGD                                                   | D   | N   | V   | I   |  |
|             | ADD37867          | GU224158         | KR2009 | P                                  | L  | S  | T                              | <a href="#">NTSGGD</a>  NTHGGD                                                   | D   | S   | V   | I   |  |

|          |          |          |          |        |   |   |   |                                                         |                                |   |   |   |
|----------|----------|----------|----------|--------|---|---|---|---------------------------------------------------------|--------------------------------|---|---|---|
|          | ABC01998 | DQ244105 | TL2005   | P      | F | S | T | <a href="#">NTSGGD</a>  NTSGGD                          | D                              | S | V | I |
|          | AAV41261 | AY772073 | ID2004   | P      | F | S | T | <a href="#">NTSGGD</a>   <a href="#">NTHGGD</a>  NTSGGD | D                              | S | V | I |
| <b>C</b> | AAV41255 | AY772067 | ID2004   | P      | L | S | T | <a href="#">NTSGGD</a>  NTHGGD                          | D                              | S | V | F |
|          | AAV41274 | AY772086 | ID2004   | P      | L | S | T | <a href="#">NTSGGD</a>  NTHGGD                          | D                              | T | V | F |
|          | ABC02013 | DQ244120 | VU2005   | P      | L | S | T | <a href="#">NTSGGD</a>  NTHGGD                          | D                              | T | V | F |
|          | ABC02014 | DQ244121 | VU2005   | P      | L | R | T | <a href="#">NTSGGD</a>  NTHGGD                          | D                              | T | V | F |
|          | ADD37874 | GU224165 | MM2009   | P      | F | S | T | <a href="#">NTSGGD</a>  NTHGGD                          | D                              | S | V | F |
|          | ADD37876 | GU224167 | KR2009   | P      | L | S | T | NTSGGD                                                  | D                              | S | V | F |
|          | ABV59183 | EU145927 | IN2007   | P      | L | S | T | <a href="#">NTSGGD</a>  NTHGGD                          | D                              | S | V | F |
|          | CAA05826 | AJ003050 | TH1997   | P      | L | S | T | <a href="#">NTSGGD</a>  NTHGGD                          | D                              | S | V | I |
|          | <b>D</b> | AAO16084 | AF525816 | TH2002 | P | F | R | T                                                       | NTSGGD                         | D | N | V |
| ADD37869 |          | GU224160 | TH2009   | P      | F | R | T | NTSGGD                                                  | D                              | N | V | I |
| ABC02001 |          | DQ244108 | TL2005   | P      | F | R | T | <a href="#">NTSGGD</a>  NTSGGD                          | D                              | N | V | I |
| ABH05707 |          | DQ789661 | IN2006   | P      | F | R | T | NTSGGD                                                  | D                              | N | V | I |
| AAV41253 |          | AY772065 | ID2004   | P      | F | R | T | NTSGGD                                                  | D                              | S | V | I |
| AAV41270 |          | AY772082 | ID2004   | P      | F | R | T | <a href="#">NTSGGD</a>  NTSGGD                          | D                              | N | V | I |
| ABC02017 |          | DQ244124 | VN2005   | P      | F | R | T | NTSGGD                                                  | D                              | N | V | I |
| AAV24553 |          | AY942932 | MM2005   | P      | F | R | T | NTSGGD                                                  | D                              | N | V | I |
| BAI79252 |          | AB547455 | IR2010   | P      | F | S | T | <a href="#">NTSGGD</a>  NTHGGD                          | D                              | N | V | I |
| ABH05685 |          | DQ789639 | IN2006   | P      | F | S | T | <a href="#">NTSGGD</a>  NTHGGD                          | D                              | N | V | I |
| ADD37863 |          | GU224154 | KR2009   | P      | F | S | T | NTSGGD                                                  | D                              | N | V | I |
| AAV41267 |          | AY772079 | ID2004   | P      | F | S | T | <a href="#">NTSGGD</a>   <a href="#">NTSGGD</a>  NTHGGD | D                              | N | V | I |
| ABC02000 |          | DQ244107 | TL2005   | P      | F | S | T | <a href="#">NTSGGD</a>  NTSGGD                          | D                              | N | V | I |
| ADD37875 |          | GU224166 | KR2009   | P      | F | S | T | <a href="#">NTSGGD</a>  NTSGGD                          | D                              | N | V | I |
| <b>E</b> |          | ABG73612 | DQ679979 | IN2006 | P | F | R | T                                                       | <a href="#">NTSGGD</a>  NTHGGD | D | N | V |
|          | ABV59202 | EU145946 | IN2007   | P      | F | R | T | <a href="#">NTSGGD</a>  NTHGGD                          | D                              | N | V | I |
|          | AAV24552 | AY942931 | MM2005   | P      | F | R | T | <a href="#">NTSGGD</a>  NTHGGD                          | D                              | N | V | I |
|          | BAI79249 | AB547452 | IR2010   | P      | F | R | T | <a href="#">NTSGGD</a>  NTHGGD                          | D                              | N | V | I |
|          | CAA05914 | AJ003156 | MM1997   | P      | F | R | T | <a href="#">NTSGGD</a>  NTHGGD                          | D                              | N | V | I |
|          | ABH05715 | DQ789669 | IN2006   | P      | F | R | T | <a href="#">NTSGGD</a>  NTHGGD                          | D                              | N | V | I |
|          | CAA05828 | AJ003052 | GF1997   | P      | F | R | T | <a href="#">NTSGGD</a>  NTHGGD                          | D                              | N | V | L |
|          | AAO16080 | AF525812 | TH2002   | P      | F | R | T | <a href="#">NTSGGD</a>  NTHGGD                          | D                              | N | V | I |
|          | ABC02005 | DQ244112 | PG2005   | P      | F | R | T | <a href="#">NTSGGD</a>  NTHGGD                          | D                              | N | V | I |
|          | ABC02010 | DQ244117 | VU2005   | P      | F | R | T | <a href="#">NTSGGD</a>  NTHGGD                          | D                              | N | V | I |
|          | ABC02003 | DQ244110 | PH2005   | P      | F | R | T | <a href="#">NTSGGD</a>  NTHGGD                          | D                              | N | V | I |
|          | ABV59165 | EU145909 | IN2007   | P      | F | S | T | <a href="#">NTSGGD</a>  NTHGGD                          | D                              | N | V | I |
|          | <b>F</b> | ABC02006 | DQ244113 | PG2005 | P | L | S | T                                                       | <a href="#">NTSGGD</a>  NTHGGD | D | S | V |
| AAV41268 |          | AY772080 | PG2004   | P      | L | R | T | <a href="#">NTSGGD</a>   <a href="#">NTHGGD</a>  NTHGGD | D                              | S | V | I |
| AAO16083 |          | AF525815 | TH2002   | P      | L | R | T | <a href="#">NTSGGD</a>  NTHGGD                          | D                              | S | V | I |
| ABH05716 |          | DQ789670 | IN2006   | P      | L | R | T | <a href="#">NTSGGD</a>  NTHGGD                          | D                              | S | V | I |
| ADD37865 |          | GU224156 | KR2009   | P      | L | R | T | NTSGGD                                                  | D                              | S | V | I |
| CAA05850 |          | AJ003077 | ID1997   | P      | L | R | T | <a href="#">NTSGGD</a>  NTHGGD                          | D                              | S | V | I |
| BAI79250 |          | AB547453 | IR2010   | P      | L | R | T | <a href="#">NTSGGD</a>  NTHGGD                          | D                              | S | V | I |



|          |           |          |         |   |   |   |   |                                       |   |   |   |   |
|----------|-----------|----------|---------|---|---|---|---|---------------------------------------|---|---|---|---|
|          | ADD37871  | GU224162 | TH2009  | P | L | R | T | <a href="#">NTSGGD</a>  NTHGGD        | D | S | V | I |
|          | AAV41256  | AY772068 | PG2004  | P | L | R | T | <a href="#">NTSGGD</a>  NTHGGD        | D | S | V | I |
|          | AAV41258  | AY772070 | PG2004  | P | F | R | T | <a href="#">NTSGGD</a>  NTHGGD        | D | S | V | I |
|          | ABV59198  | EU145942 | IN2007  | P | F | R | T | <a href="#">NTSGGD</a>  NTHGGD        | D | S | V | I |
|          | BAI79251  | AB547454 | IR2010  | P | L | R | T | <a href="#">NTSGGD</a>  NTHGGD        | D | N | V | I |
|          | AAV24548  | AY942927 | MM2005  | P | L | R | M | NTSGGD                                | D | N | V | I |
|          | AAV24550  | AY942929 | MM2005  | P | L | R | M | <a href="#">NTSGGD</a>  NTHGGD        | D | N | V | I |
| <b>G</b> | AAO16085  | AF525817 | TH2002  | P | F | R | T | NTSGGD                                | D | T | V | I |
|          | AAV24547  | AY942926 | MM2005  | P | F | R | T | NTSGGD                                | D | T | V | I |
|          | ADD37864  | GU224155 | KR2009  | P | F | S | T | NTSGGD                                | D | T | V | I |
|          | AAV41271  | AY772083 | ID2004  | P | F | R | M | <a href="#">NTSGGD</a>  NTHGGD        | D | T | V | I |
|          | AAV24554  | AY942933 | MM2005  | P | I | R | M | <a href="#">NTSGGD</a>  NTHGGD        | D | T | V | I |
|          | AAO16087  | AF525819 | TH2002  | P | I | R | M | <a href="#">NTSGGD</a>  NTHGGD        | D | T | V | I |
|          | ADD37870  | GU224161 | TH2009  | P | I | R | M | <a href="#">NTSGGD</a>  NTHGGD        | D | T | V | I |
|          | AAO16089  | AF525821 | TH2002  | P | L | R | M | <a href="#">NTSGGD</a>  NTHGGD        | D | T | V | I |
|          | ADD37872  | GU224163 | PG2009  | P | L | R | M | <a href="#">NTSGGD</a>  NTHGGD NTHGGD | D | T | V | I |
|          | AAO16086  | AF525818 | TH2002  | P | L | R | T | NTSGGD                                | D | T | V | I |
|          | AAV41272  | AY772084 | ID2004  | P | L | R | T | <a href="#">NTSGGD</a>  NTHGGD        | D | T | V | I |
|          | ABC02008  | DQ244115 | PG2005  | P | L | R | M | <a href="#">NTSGGD</a>  NTHGGD NTHGGD | D | T | V | I |
|          | Pvachtk-2 | KC121335 | TH2012* | P | L | R | M | <a href="#">NTSGGD</a>  NTHGGD        | D | T | V | I |
|          | Pvachtk-1 | KC121334 | TH2012* | P | L | R | M | <a href="#">NTSGGD</a>  NTHGGD        | N | T | L | I |
|          | AAV24549  | AY942928 | MM2005  | P | L | R | M | NTSGGD                                | D | T | V | I |
|          | AAV41275  | AY772087 | ID2004  | P | L | R | M | <a href="#">NTSGGD</a>  NTHGGD        | D | T | V | I |
|          | ABG73608  | DQ679975 | IN2006  | P | L | R | M | <a href="#">NTSGGD</a>  NTHGGD        | D | T | V | I |
|          | ADD37868  | GU224159 | TH2009  | P | L | R | M | <a href="#">NTSGGD</a>  NTHGGD        | D | T | V | I |
|          | ABH05714  | DQ789668 | IN2006  | P | L | R | M | <a href="#">NTSGGD</a>  NTHGGD        | D | T | V | I |
|          | Pvdibbt-1 | KC121333 | TH2012* | P | L | R | M | <a href="#">NTSGGD</a>  NTHGGD        | D | T | V | I |
|          | AAV41254  | AY772066 | ID2004  | P | L | R | M | <a href="#">NTSGGD</a>  NTHGGD        | D | S | V | I |
|          | AAV24551  | AY942930 | MM2005  | P | L | R | M | <a href="#">NTSGGD</a>  NTHGGD        | D | T | V | I |
|          | ABV59182  | EU145926 | IN2007  | P | L | R | M | <a href="#">NTSGGD</a>  NTHGGD        | D | T | V | I |

Based on the phylogenetic analysis of the representative *Pvdhfr* haplotypes shown in **Figure 3**, *P. vivax* DHFR homologs possess the potential point mutations (blue-color highlighted)<sup>a</sup> or amino acid substitutions at positions Phe57Leu/Ile, Ser58Arg, Thr61Met and Ser117Asn/Thr and, additionally, Pro33Leu, Asp105Asn, Val145Leu, and Ile173Phe/Leu.

<sup>a</sup>Indel shows one short tandem repeat of wild type haplotype (NTHGGD) or prone haplotype (NTSGGD)<sup>a</sup> that possesses the substitution at position His99Ser. Additional short tandem repeats<sup>a</sup> are blue-color highlighted.

\*3 haplotypes of *P. vivax* originally isolated from the same 2 *An. aconitus* and one *An. dirus* SG DNA isolates were used in the phylogenetic analysis.
